# Supplementary material for: Hypoxia-Induced miR-675-5p Supports β-Catenin Nuclear Localization by Regulating GSK3-β Activity in Colorectal Cancer Cell Lines
Source: PubMed Central journal article supplement (PMC7312749; doi:10.3390/ijms21113832), 2020-05-28
Supplement: ijms-21-03832-s001.pdf [file ijms-21-03832-s001.pdf]

**Table S1.** The whole mirWalk2.0 output table, in which predicted miR-675-5p target genes are grouped into known KEGG pathways. Green background marks the significant pathways after p-value adjustment (multiple testing method or FDR correction, BH < 0.05) and yellow background highlights the results that are interesting for this study. The first result is a group of cancer pathways, with a strong significance score, provided by Fisher’s correlation test. Other significant pathways are, as expected, Wnt signaling cascade and colorectal cancer-specific pathways. According to the mirWalk site, “PathFg”, “PathBg”, “GenomeFG” and “GenomeBG” stand for “number of genes predicted as putative targets in a given pathway”, “number of genes in a given pathway”, “total number of target genes within genome” and “total number of genes within genome”. BH values are calculated by correcting the p-value in order to take account for false discovery rates. This table is supposed to serve as a guide to discover predicted patterns that deserve further experimental investigation and should not be considered a validation. In this case, our interest is in Wnt and cancer pathways, and both seem to be significantly correlated with miR-675 activity.

| Path Name                         | PathFg | PathBg | GenomeFG | GenomeBG | Fisher               | BH                   |
|-----------------------------------|--------|--------|----------|----------|----------------------|----------------------|
| Pathways in cancer                | 194    | 330    | 7824     | 19747    | 1.08767115359224e-12 | 2.11008203796895e-10 |
| Endocytosis                       | 119    | 187    | 7824     | 19747    | 2.36849767596898e-11 | 4.57120051462014e-09 |
| Axon guidance                     | 82     | 129    | 7824     | 19747    | 3.10261420697335e-08 | 5.95701927738883e-06 |
| Wnt signaling pathway             | 92     | 152    | 7824     | 19747    | 1.41756058999002e-07 | 2.70754072688093e-05 |
| Calcium signaling pathway         | 103    | 178    | 7824     | 19747    | 6.01459913338398e-07 | 0.000114277383534296 |
| Neurotrophin signaling pathway    | 78     | 129    | 7824     | 19747    | 1.30173227685124e-06 | 0.000244725668048034 |
| Chronic myeloid leukemia          | 50     | 75     | 7824     | 19747    | 1.92275693712056e-06 | 0.000359555547241545 |
| MAPK signaling pathway            | 145    | 272    | 7824     | 19747    | 2.95074892577114e-06 | 0.000548839300193432 |
| Pancreatic cancer                 | 49     | 75     | 7824     | 19747    | 5.81490004869364e-06 | 0.00106994160895963  |
| mTOR signaling pathway            | 37     | 53     | 7824     | 19747    | 8.18331849790223e-06 | 0.00149754728511611  |
| Colorectal cancer                 | 54     | 86     | 7824     | 19747    | 1.14972069760866e-05 | 0.00210398887662385  |
| Insulin signaling pathway         | 80     | 139    | 7824     | 19747    | 1.36945480429449e-05 | 0.00249240774381597  |
| Glioma                            | 42     | 65     | 7824     | 19747    | 3.96095474374029e-05 | 0.00709010899129512  |
| Long-term potentiation            | 45     | 71     | 7824     | 19747    | 4.32844611495722e-05 | 0.00770463408462384  |
| ErbB signaling pathway            | 54     | 89     | 7824     | 19747    | 4.66335531297931e-05 | 0.00830077245710316  |
| Oocyte meiosis                    | 65     | 112    | 7824     | 19747    | 5.9775120347932e-05  | 0.010520421181236    |
| Dilated cardiomyopathy            | 55     | 94     | 7824     | 19747    | 0.000159516203595992 | 0.0269582384077227   |
| Chemokine signaling pathway       | 99     | 189    | 7824     | 19747    | 0.000241921533764226 | 0.0404008961386258   |
| Prostate cancer                   | 52     | 89     | 7824     | 19747    | 0.000250229905150344 | 0.0417883941601075   |
| Apoptosis                         | 51     | 87     | 7824     | 19747    | 0.000255407139293556 | 0.0426529922620238   |
| T cell receptor signaling pathway | 62     | 110    | 7824     | 19747    | 0.000272138442226606 | 0.0451749814096166   |
| B cell receptor signaling pathway | 45     | 75     | 7824     | 19747    | 0.00027986681181092  | 0.0464578907606126   |
| Gap junction                      | 52     | 90     | 7824     | 19747    | 0.000365892436877147 | 0.0603722520847293   |
| Non-small cell lung cancer        | 34     | 54     | 7824     | 19747    | 0.000437412608745171 | 0.071735667834208    |
| Fc gamma R mediated phagocytosis  | 55     | 97     | 7824     | 19747    | 0.000481131819360118 | 0.0780584942304217   |
| Melanogenesis                     | 57     | 102    | 7824     | 19747    | 0.00063087954266114  | 0.100309847283121    |
| Renal cell carcinoma              | 42     | 71     | 7824     | 19747    | 0.000669780333302486 | 0.105825292661793    |
| Focal adhesion                    | 103    | 203    | 7824     | 19747    | 0.000813095542915883 | 0.126842904694878    |
| GnRH signaling pathway            | 58     | 105    | 7824     | 19747    | 0.000839052621275231 | 0.130892208918936    |
| Small cell lung cancer            | 48     | 84     | 7824     | 19747    | 0.00084939212374525  | 0.132505171304259    |
| Endometrial cancer                | 32     | 52     | 7824     | 19747    | 0.00113140993192025  | 0.174237129515718    |
| Regulation of actin cytoskeleton  | 106    | 212    | 7824     | 19747    | 0.00131980798634701  | 0.201930621911093    |

|                                                      |    |     |      |       |                     |                   |
|------------------------------------------------------|----|-----|------|-------|---------------------|-------------------|
| SNARE interactions in vesicular transport            | 25 | 39  | 7824 | 19747 | 0.00170957080575779 | 0.259854762475183 |
| Arrhythmogenic right ventricular cardiomyopathy ARVC | 42 | 74  | 7824 | 19747 | 0.002085871071415   | 0.314966531783665 |
| Acute myeloid leukemia                               | 34 | 58  | 7824 | 19747 | 0.00261171058777866 | 0.3917565881668   |
| Melanoma                                             | 40 | 71  | 7824 | 19747 | 0.00316162631320975 | 0.471082320668253 |
| Progesterone mediated oocyte maturation              | 48 | 88  | 7824 | 19747 | 0.00318490384134943 | 0.474550672361065 |
| VEGF signaling pathway                               | 43 | 78  | 7824 | 19747 | 0.0039217479844374  | 0.569647965044282 |
| Basal cell carcinoma                                 | 32 | 55  | 7824 | 19747 | 0.00405523817315612 | 0.588009535107637 |
| Notch signaling pathway                              | 28 | 47  | 7824 | 19747 | 0.00442162446433151 | 0.636713922863737 |
| Vascular smooth muscle contraction                   | 60 | 116 | 7824 | 19747 | 0.00535381834849955 | 0.760242205486936 |
| Hedgehog signaling pathway                           | 32 | 56  | 7824 | 19747 | 0.0059050954222041  | 0.826713359108574 |
| Long-term depression                                 | 40 | 73  | 7824 | 19747 | 0.00608159040927497 | 0.851422657298496 |
| Hypertrophic cardiomyopathy HCM                      | 46 | 86  | 7824 | 19747 | 0.00625098766282358 | 0.875138272795301 |
| Aldosterone regulated sodium reabsorption            | 25 | 42  | 7824 | 19747 | 0.0071011523180801  | 0.979959019895054 |
| Circadian rhythm mammal                              | 10 | 13  | 7824 | 19747 | 0.00718329701506948 | 0.984111691064519 |
| Inositol phosphate metabolism                        | 28 | 54  | 7824 | 19747 | 0.0457035400640318  | 1                 |
| Phosphatidylinositol signaling system                | 40 | 76  | 7824 | 19747 | 0.0144558256057898  | 1                 |
| Lysosome                                             | 59 | 121 | 7824 | 19747 | 0.0253264686283214  | 1                 |
| Biosynthesis of unsaturated fatty acids              | 13 | 22  | 7824 | 19747 | 0.0509852902103153  | 1                 |
| p53 signaling pathway                                | 34 | 68  | 7824 | 19747 | 0.0528094460844275  | 1                 |
| Ubiquitin mediated proteolysis                       | 64 | 134 | 7824 | 19747 | 0.0334039905907191  | 1                 |
| Pentose phosphate pathway                            | 17 | 27  | 7824 | 19747 | 0.0119823127887169  | 1                 |
| Purine metabolism                                    | 73 | 158 | 7824 | 19747 | 0.0537983179526431  | 1                 |
| Dorso ventral axis formation                         | 14 | 24  | 7824 | 19747 | 0.0492932162866022  | 1                 |
| Cell adhesion molecules CAMs                         | 62 | 133 | 7824 | 19747 | 0.0595170796154884  | 1                 |
| Primary bile acid biosynthesis                       | 10 | 16  | 7824 | 19747 | 0.0546237774699997  | 1                 |
| Amyotrophic lateral sclerosis ALS                    | 30 | 55  | 7824 | 19747 | 0.0175786299345459  | 1                 |
| Thyroid cancer                                       | 17 | 29  | 7824 | 19747 | 0.0297814820374443  | 1                 |
| Adipocytokine signaling pathway                      | 37 | 70  | 7824 | 19747 | 0.0167841882148267  | 1                 |
| Tight junction                                       | 62 | 132 | 7824 | 19747 | 0.0510986135923944  | 1                 |
| Adherens junction                                    | 39 | 76  | 7824 | 19747 | 0.0253272083114254  | 1                 |
| Bladder cancer                                       | 23 | 43  | 7824 | 19747 | 0.0453807292108869  | 1                 |

---

**Table S2.** mirWalk Analysis. MirWalk [26] identified consensus sequence for the miR-675-5p (miRbase MIMAT0004284) on the transcripts indicated in the table.

| genesymbol | refseqid     | start | end  | energy | number of pairings | binding region length | longest_consecutive_pairings | position |
|------------|--------------|-------|------|--------|--------------------|-----------------------|------------------------------|----------|
| GSK3B      | NM_002093    | 4126  | 4151 | -25.9  | 19                 | 25                    | 10                           | 3UTR     |
|            | NM_002093    | 1965  | 1998 | -26.3  | 21                 | 33                    | 7                            | CDS      |
|            | NM_001146156 | 4087  | 4112 | -25.9  | 19                 | 25                    | 10                           | 3UTR     |
|            | NM_001146156 | 1926  | 1959 | -26.3  | 21                 | 33                    | 7                            | CDS      |
| PPP2CA     | NM_002715    | 2209  | 2248 | -27.8  | 20                 | 25                    | 10                           | 3UTR     |
| PPP2R2B    | NM_181674    | 205   | 265  | -28.9  | 22                 | 48                    | 5                            | 5UTR     |
|            | NM_181675    | 1302  | 1334 | -24.8  | 19                 | 32                    | 7                            | CDS      |
|            | NM_181675    | 167   | 195  | -25.7  | 18                 | 28                    | 8                            | CDS      |
|            | NM_181676    | 205   | 265  | -28.9  | 22                 | 48                    | 5                            | 5UTR     |
|            | NM_181678    | 1225  | 1257 | -24.8  | 19                 | 32                    | 7                            | CDS      |
|            | NM_001271899 | 1255  | 1287 | -24.8  | 19                 | 32                    | 7                            | CDS      |
|            | NM_001271900 | 1449  | 1481 | -24.8  | 19                 | 32                    | 7                            | CDS      |
|            | NM_001271948 | 167   | 195  | -25.7  | 18                 | 28                    | 8                            | 5UTR     |
| PPP2R1A    | NM_014225    | 1003  | 1045 | -32.4  | 19                 | 34                    | 10                           | CDS      |
|            | NM_014225    | 696   | 731  | -31.7  | 19                 | 35                    | 11                           | CDS      |
|            | NM_014225    | 2136  | 2162 | -28.2  | 20                 | 26                    | 8                            | 3UTR     |

Supplementary Figure S1

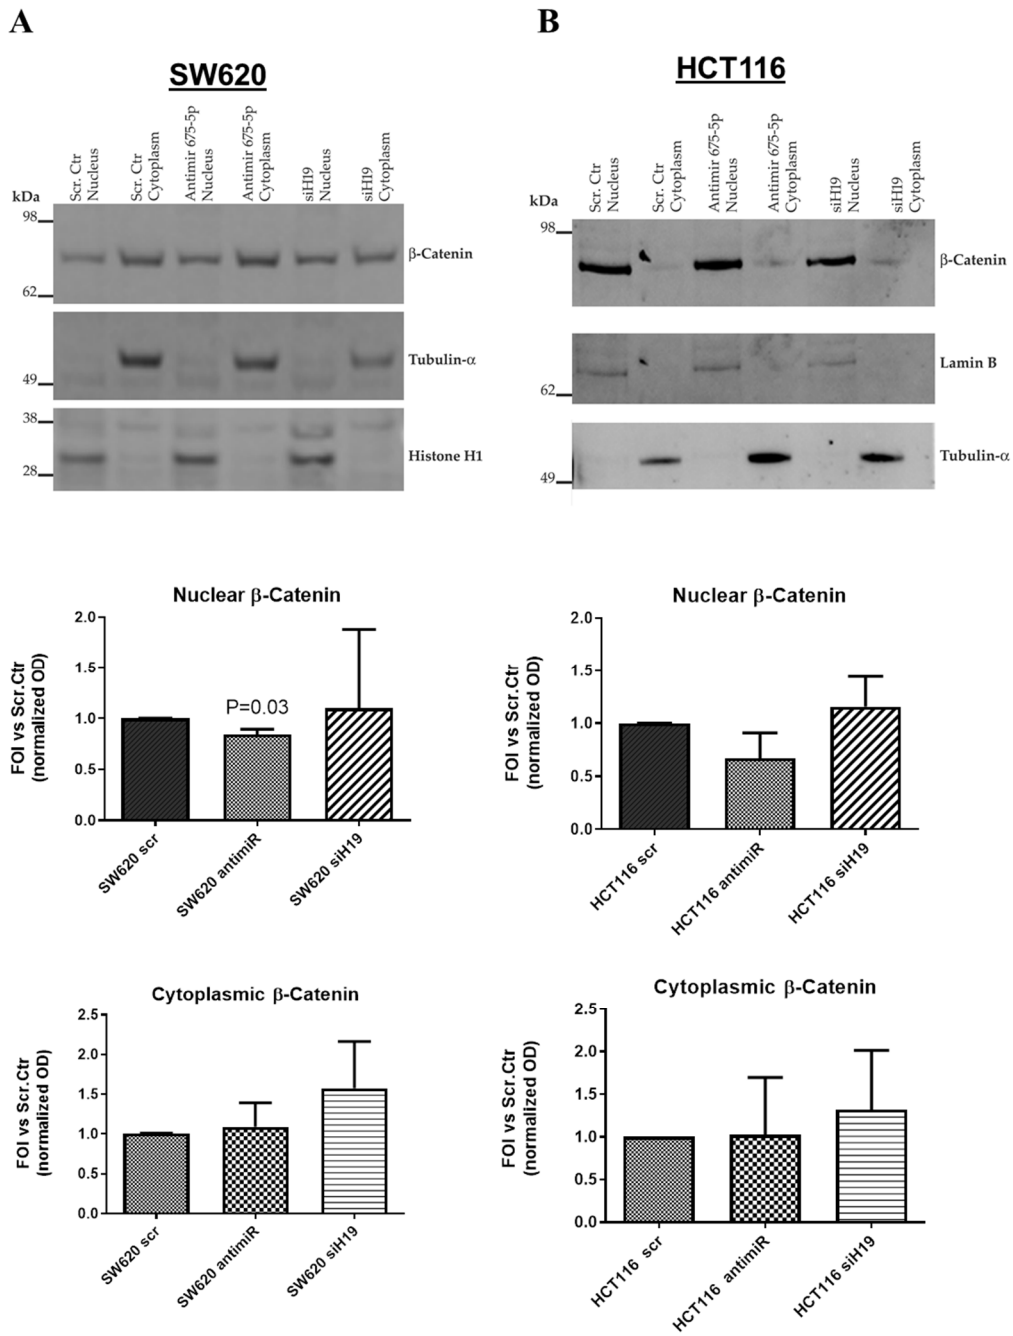

**Supplementary Figure S1.** Representative images and densitometric analyses of the Western blots for β-catenin on nuclear and cytoplasmic protein extracts from SW620 (A) and HCT116 (B) transfected with Antimir-675-5p, siH19 or scrambled negative control and subjected to 18 hours of hypoxic stimulation.

Supplementary Figure S2

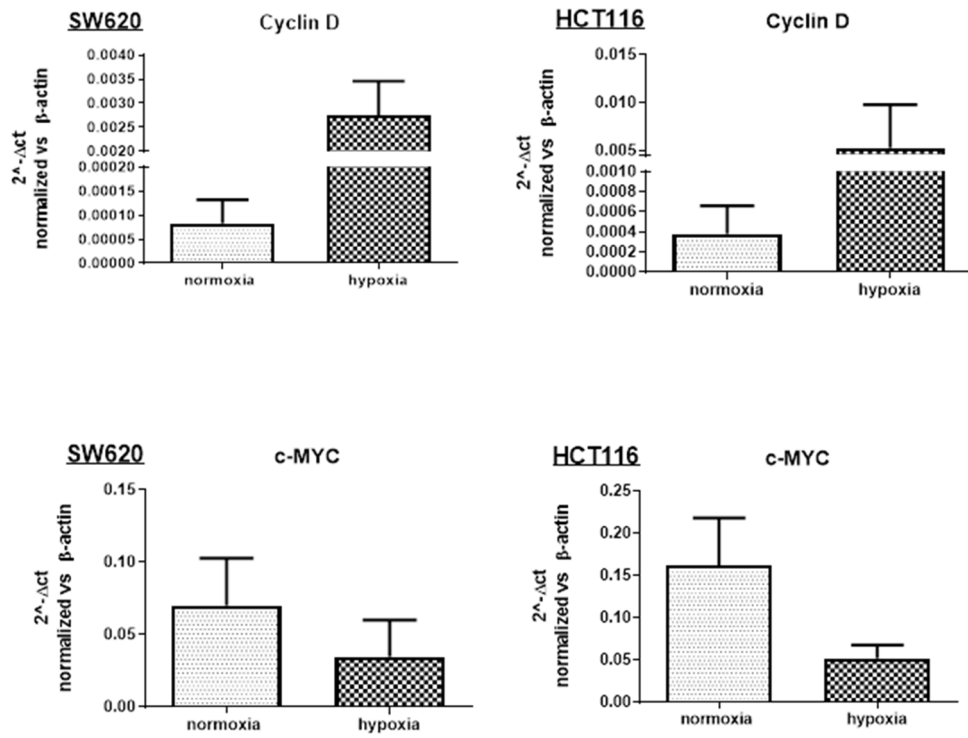

**Supplementary Figure S2.** Real-time PCR for c-MYC and Cyclin D1 in SW620 (left panels) and HCT116 (right panels) cells in normoxic conditions subjected to 18 hours of hypoxic stimulation. Gene expression data represented as  $2^{-\Delta\Delta ct}$  normalized for  $\beta$ -actin. Data are expressed as the mean  $\pm$  SD of three independent experiments.
